# Supplementary material
Source: PubMed Central journal article supplement (PMC3142674)
Supplement: NIHMS296196-supplement-01.pdf [file NIHMS296196-supplement-01.pdf]

# U.S. Primary Care Physicians' Diet, Physical Activity, and Weight-Related Care of Adult Patients

Ashley Wilder Smith, PhD, MPH, Laurel A. Borowski, MPH, Benmei Liu, PhD, Deborah A. Galuska, PhD, Caroline Signore, MD, MPH, Carrie Klabunde, PhD, Terry T-K Huang, PhD, MPH, Susan M. Krebs-Smith, PhD, Erica Frank, MD, MPH, Nico Pronk, PhD, Rachel Ballard-Barbash, MD, MPH

---

## Appendix A

### **Additional information on sample selection and survey fielding**

Physicians were screened for eligibility. Screening was performed using phone calls to verify: (1) the primary care physician's (PCP) mailing address; (2) the PCP's specialty and practice status; (3) whether physicians treated adults or children; and (4) inclusion criteria. Physicians who were retired, in residency training, or involved in full-time teaching, research, or administration were excluded. During the screening, we also determined whether those who described themselves as family physicians treated children, adults, or both. Those who treated children were sent a child-focused questionnaire. Those who did not were sent an adult-focused questionnaire.

A random sample of 4429 physicians was drawn using specialty as the sampling strata to meet the targeted sample size of at least 400 respondents per PCP specialty. The sample weight within each specialty stratum was proportional to the specialty's representation in the total U.S. physician population. The sampling frame database was sorted by U.S. Census region (Northeast, Midwest, South, and West); practice urbanicity; and physician gender to ensure adequate representation of these characteristics. Within each specialty stratum, physicians were sorted by these variables in order to achieve implicit representation before sample selection.

Eligible physicians were sent a package containing a questionnaire with a cover letter from the National Cancer Institute describing the importance of their participation, a detailed description of the study, a letter of support from their specialty organization, a U.S. Postal Service postage-paid return envelope, and a prepaid \$30 honorarium check. Up to four additional mailings were sent to the physician's office or home, with phone, fax, and e-mail reminders sent to nonresponders.

## Appendix B

### **Additional Information on the specific survey questions used**

Energy-balance clinical practices were assessed in a variety of ways. Questions asked how often primary care providers (PCPs): (1) *Provide general counseling for changing diet, physical activity or weight control*; (2) *Provide specific guidance on each of these behaviors*; (3) *Refer these patients to another health professional or program for further evaluation or management*; and (4) *Systematically track/follow patients over time concerning behaviors or other measures of progress related to diet, physical activity or weight*. Response options were: *always, often, sometimes, rarely, never*. PCPs were then asked if they formally assessed their patients' diet, physical activity, and sedentary behavior, and if yes, with what type of assessment tools. PCPs also were asked how often they recorded measures of weight status (e.g., weight on a scale, BMI, waist circumference). Response categories were: *every well-patient visit, every visit, annually, as clinically indicated, and never*. Finally, PCPs were asked if they had ever prescribed pharmacologic treatments for weight control or referred any patients for surgical treatment for obesity. Response categories were: *yes and no*.

## Appendix C

### Sample characteristics by physician specialty

| Physician characteristics                        | Total<br>n=1211<br>n (%) | Internal medicine<br>n=403<br>n (%) | Family practice<br>n=388<br>n (%) | OB/GYN<br>n=420<br>n (%) |
|--------------------------------------------------|--------------------------|-------------------------------------|-----------------------------------|--------------------------|
| <b>Age (≥50 years)</b>                           | 610 (50.4)               | 209 (51.6)                          | 184 (48.2)                        | 217 (51.8)               |
| <b>Years since medical school</b>                |                          |                                     |                                   |                          |
| <10                                              | 197 (16.3)               | 48 (12.5)                           | 59 (15.1)                         | 90 (20.1)                |
| 10–20                                            | 367 (31.8)               | 123 (30.3)                          | 132 (32.5)                        | 112 (32.7)               |
| 20–30                                            | 370 (31.2)               | 131 (32.5)                          | 123 (28.5)                        | 116 (31.2)               |
| >30                                              | 277 (20.8)               | 101 (29.7)                          | 106 (24.0)                        | 70 (16.0)                |
| <b>Gender (female)</b>                           | 450 (36.0)               | 131 (32.8)                          | 133 (35.0)                        | 186 (44.6)               |
| <b>Race/ethnicity</b>                            |                          |                                     |                                   |                          |
| White, non-Hispanic                              | 846 (69.9)               | 243 (60.1)                          | 296 (76.3)                        | 307 (73.6)               |
| African-American, non-Hispanic                   | 70 (5.4)                 | 20 (5.1)                            | 16 (4.4)                          | 34 (7.9)                 |
| Asian-American, non-Hispanic                     | 175 (15.1)               | 98 (24.3)                           | 41 (10.2)                         | 36 (8.5)                 |
| Hispanic                                         | 49 (3.8)                 | 15 (3.7)                            | 15 (3.7)                          | 19 (4.3)                 |
| Other                                            | 22 (1.8)                 | 9 (2.3)                             | 6 (1.4)                           | 7 (1.7)                  |
| Missing                                          | 49 (4.2)                 | 18 (4.5)                            | 17 (4.1)                          | 14 (3.9)                 |
| <b>International medical graduate</b>            | 267 (23.1)               | 140 (35.2)                          | 65 (16.9)                         | 62 (14.3)                |
| <b>Board certified</b>                           | 1011 (83.5)              | 334 (82.4)                          | 330 (85.6)                        | 347 (80.9)               |
| Missing                                          | 200 (16.5)               | 69 (17.7)                           | 73 (19.1)                         | 58 (14.4)                |
| <b>Census region</b>                             |                          |                                     |                                   |                          |
| Northeast                                        | 244 (20.0)               | 97 (24.3)                           | 56 (15.5)                         | 91 (22.2)                |
| Midwest                                          | 282 (24.2)               | 75 (18.2)                           | 123 (31.1)                        | 84 (20.0)                |
| South                                            | 412 (33.4)               | 149 (37.0)                          | 117 (30.2)                        | 146 (33.9)               |
| West                                             | 273 (22.4)               | 82 (20.5)                           | 92 (23.3)                         | 99 (23.9)                |
| <b>Practice urbanicity</b>                       |                          |                                     |                                   |                          |
| Large city                                       | 247 (18.9)               | 96 (23.8)                           | 52 (13.1)                         | 99 (23.1)                |
| Medium city                                      | 244 (19.3)               | 77 (19.3)                           | 71 (18.0)                         | 96 (22.5)                |
| Small city                                       | 273 (22.7)               | 83 (20.3)                           | 92 (24.3)                         | 98 (23.6)                |
| Rural                                            | 156 (14.7)               | 45 (11.2)                           | 81 (21.0)                         | 30 (6.9)                 |
| Missing                                          | 290 (24.3)               | 102 (25.4)                          | 96 (23.7)                         | 92 (23.6)                |
| <b>Practice type</b>                             |                          |                                     |                                   |                          |
| Solo                                             | 309 (25.2)               | 134 (33.7)                          | 74 (19.6)                         | 101 (21.9)               |
| Other                                            | 713 (58.9)               | 213 (52.2)                          | 245 (60.0)                        | 255 (65.7)               |
| Missing                                          | 189 (15.2)               | 56 (14.1)                           | 74 (18.1)                         | 59 (14.7)                |
| Single-specialty group                           | 404 (32.3)               | 88 (21.7)                           | 139 (36.5)                        | 177 (42.9)               |
| Multi-specialty group                            | 232 (19.8)               | 96 (23.5)                           | 80 (19.4)                         | 56 (13.7)                |
| Missing                                          | 570 (47.4)               | 218 (54.6)                          | 187 (43.4)                        | 165 (43.1)               |
| <b>Patient volume and insurance</b>              |                          |                                     |                                   |                          |
| >100 patient visits per week                     | 339 (28.9)               | 111 (27.3)                          | 122 (31.7)                        | 106 (25.8)               |
| Missing                                          | 41 (3.5)                 | 13 (3.3)                            | 14 (3.2)                          | 14 (3.8)                 |
| >50% in managed care                             | 107 (8.2)                | 30 (7.4)                            | 28 (7.2)                          | 49 (11.7)                |
| Missing                                          | 645 (54.0)               | 217 (54.2)                          | 215 (52.2)                        | 213 (54.7)               |
| <b>Patient population treated (age in years)</b> |                          |                                     |                                   |                          |
| <2                                               | 325 (37.1)               | 12 (3.1)                            | 302 (80.4)                        | 11 (3.5)                 |
| Missing                                          | 26 (2.0)                 | 10 (2.5)                            | 11 (2.5)                          | 5 (1.4)                  |
| 2–11                                             | 428 (46.1)               | 31 (7.9)                            | 353 (93.1)                        | 44 (11.4)                |
| Missing                                          | 23 (1.6)                 | 9 (2.3)                             | 12 (2.7)                          | 2 (0.5)                  |
| 12–17                                            | 914 (74.8)               | 155 (38.6)                          | 374 (97.6)                        | 385 (91.7)               |
| Missing                                          | 13 (1.2)                 | 9 (2.3)                             | 2 (0.5)                           | 2 (0.5)                  |
| 18–65                                            | 1207 (99.7)              | 400 (99.3)                          | 388 (100.0)                       | 419 (99.8)               |
| Missing                                          | 2 (0.2)                  | 2 (0.5)                             | 0 (0.0)                           | 0 (0.0)                  |
| ≥66                                              | 1185 (98.4)              | 397 (98.5)                          | 386 (99.5)                        | 402 (95.7)               |
| Missing                                          | 6 (0.5)                  | 3 (0.8)                             | 2 (0.5)                           | 1 (0.3)                  |

## Appendix D

### Primary care physicians' counseling, referral and follow-up of diet, physical activity, and weight control

| Physician characteristics                                                                                                                             | Total<br>n=1211 | Internal<br>medicine<br>n=403 | Family<br>practice<br>n=388 | OB/GYN<br>n=420 | p-<br>value |
|-------------------------------------------------------------------------------------------------------------------------------------------------------|-----------------|-------------------------------|-----------------------------|-----------------|-------------|
| <b>Patients without chronic disease</b>                                                                                                               | <b>n (%)</b>    | <b>n (%)</b>                  | <b>n (%)</b>                | <b>n (%)</b>    |             |
| <b>Provide general counseling for diet, physical activity, and weight control</b>                                                                     |                 |                               |                             |                 |             |
| Always                                                                                                                                                | 293 (26.3)      | 130 (33.0)                    | 91 (24.8)                   | 72 (16.9)       | <0.001      |
| Often                                                                                                                                                 | 642 (53.8)      | 199 (49.9)                    | 219 (57.1)                  | 224 (53.8)      |             |
| Sometimes/rarely/never <sup>a</sup>                                                                                                                   | 258 (19.9)      | 67 (17.0)                     | 69 (18.1)                   | 122 (29.3)      |             |
| <b>PROVIDE SPECIFIC GUIDANCE ON:</b>                                                                                                                  |                 |                               |                             |                 |             |
| <b>Diet/nutrition</b>                                                                                                                                 |                 |                               |                             |                 |             |
| Always                                                                                                                                                | 267 (23.6)      | 112 (28.1)                    | 87 (23.0)                   | 68 (16.5)       | <0.01       |
| Often                                                                                                                                                 | 658 (54.3)      | 212 (52.5)                    | 210 (55.1)                  | 236 (56.2)      |             |
| Sometimes/rarely/never <sup>a</sup>                                                                                                                   | 279 (22.1)      | 77 (19.5)                     | 87 (21.9)                   | 115 (27.3)      |             |
| <b>Physical activity</b>                                                                                                                              |                 |                               |                             |                 |             |
| Always                                                                                                                                                | 343 (30.3)      | 149 (37.3)                    | 107 (28.5)                  | 87 (20.9)       | <0.001      |
| Often                                                                                                                                                 | 675 (55.7)      | 209 (51.8)                    | 227 (58.5)                  | 239 (56.9)      |             |
| Sometimes/rarely/never <sup>a</sup>                                                                                                                   | 185 (14.0)      | 43 (10.9)                     | 50 (13.0)                   | 92 (22.2)       |             |
| <b>Weight control</b>                                                                                                                                 |                 |                               |                             |                 |             |
| Always                                                                                                                                                | 240 (21.5)      | 110 (27.5)                    | 76 (20.1)                   | 54 (13.0)       | <0.001      |
| Often                                                                                                                                                 | 580 (48.8)      | 200 (49.7)                    | 191 (49.8)                  | 189 (45.1)      |             |
| Sometimes/rarely/never <sup>a</sup>                                                                                                                   | 381 (29.7)      | 92 (22.8)                     | 114 (30.1)                  | 175 (41.9)      |             |
| <b>Refer patients for further evaluation and/or management</b>                                                                                        |                 |                               |                             |                 |             |
| Always                                                                                                                                                | 26 (2.0)        | 13 (3.3)                      | 3 (0.7)                     | 10 (2.4)        | <0.01       |
| Often                                                                                                                                                 | 201 (15.7)      | 55 (13.9)                     | 56 (14.5)                   | 90 (22.0)       |             |
| Sometimes                                                                                                                                             | 535 (45.1)      | 174 (42.9)                    | 182 (48.1)                  | 179 (42.7)      |             |
| Rarely/never <sup>b</sup>                                                                                                                             | 442 (37.2)      | 158 (39.8)                    | 143 (36.8)                  | 141 (33.0)      |             |
| <b>Systematically track/follow patients over time concerning behaviors or other measure of progress related to diet, physical activity, or weight</b> |                 |                               |                             |                 |             |
| Always                                                                                                                                                | 102 (9.2)       | 62 (15.7)                     | 29 (6.7)                    | 11 (2.5)        | <0.001      |
| Often                                                                                                                                                 | 367 (33.5)      | 163 (40.2)                    | 134 (35.3)                  | 70 (17.0)       |             |
| Sometimes                                                                                                                                             | 365 (31.5)      | 107 (26.7)                    | 138 (37.1)                  | 120 (28.2)      |             |
| Rarely/never <sup>b</sup>                                                                                                                             | 372 (25.8)      | 70 (17.5)                     | 83 (21.0)                   | 219 (52.3)      |             |
| <b>Patients with chronic disease</b>                                                                                                                  | <b>n (%)</b>    | <b>n (%)</b>                  | <b>n (%)</b>                | <b>n (%)</b>    |             |
| <b>Provide general counseling for diet, physical activity, and weight control</b>                                                                     |                 |                               |                             |                 |             |
| Always                                                                                                                                                | 565 (50.2)      | 246 (61.5)                    | 184 (48.6)                  | 135 (32.3)      | <0.001      |
| Often                                                                                                                                                 | 523 (42.6)      | 140 (34.9)                    | 175 (46.0)                  | 208 (49.7)      |             |
| Sometimes/rarely/never <sup>a</sup>                                                                                                                   | 109 (7.2)       | 14 (3.6)                      | 20 (5.4)                    | 75 (18.0)       |             |
| <b>PROVIDE SPECIFIC GUIDANCE ON:</b>                                                                                                                  |                 |                               |                             |                 |             |
| <b>Diet/nutrition</b>                                                                                                                                 |                 |                               |                             |                 |             |
| Always                                                                                                                                                | 483 (43.4)      | 220 (54.8)                    | 159 (42.1)                  | 104 (24.8)      | <0.001      |
| Often                                                                                                                                                 | 565 (45.4)      | 149 (36.9)                    | 186 (48.3)                  | 230 (54.6)      |             |
| Sometimes/rarely/never <sup>a</sup>                                                                                                                   | 157 (11.3)      | 33 (8.3)                      | 38 (9.6)                    | 86 (20.6)       |             |
| <b>Physical activity</b>                                                                                                                              |                 |                               |                             |                 |             |
| Always                                                                                                                                                | 549 (48.7)      | 246 (61.3)                    | 174 (46.1)                  | 129 (30.5)      | <0.001      |
| Often                                                                                                                                                 | 551 (44.6)      | 134 (33.4)                    | 194 (50.1)                  | 223 (53.2)      |             |

|                                                                                                                                                       |            |            |            |            |        |
|-------------------------------------------------------------------------------------------------------------------------------------------------------|------------|------------|------------|------------|--------|
| Sometimes/rarely/never <sup>a</sup>                                                                                                                   | 104 (6.8)  | 21 (5.3)   | 15 (3.8)   | 68 (16.3)  |        |
| <b>Weight control</b>                                                                                                                                 |            |            |            |            |        |
| Always                                                                                                                                                | 431 (38.7) | 201 (50.7) | 140 (36.6) | 90 (21.2)  | <0.001 |
| Often                                                                                                                                                 | 531 (44.2) | 158 (39.5) | 181 (47.3) | 192 (46.0) |        |
| Sometimes/rarely/never                                                                                                                                | 238 (17.1) | 39 (9.8)   | 62 (16.1)  | 137 (32.8) |        |
| <b>Refer patients for further evaluation and/or management</b>                                                                                        |            |            |            |            |        |
| Always                                                                                                                                                | 89 (6.7)   | 34 (8.5)   | 16 (3.9)   | 39 (9.3)   | <0.01  |
| Often                                                                                                                                                 | 412 (34.3) | 125 (30.8) | 140 (37.2) | 147 (34.6) |        |
| Sometimes                                                                                                                                             | 492 (41.8) | 162 (40.2) | 170 (44.3) | 160 (38.8) |        |
| Rarely/never <sup>b</sup>                                                                                                                             | 213 (17.3) | 81 (20.5)  | 58 (14.6)  | 74 (17.2)  |        |
| <b>Systematically track/follow patients over time concerning behaviors or other measure of progress related to diet, physical activity, or weight</b> |            |            |            |            |        |
| Always                                                                                                                                                | 228 (21.2) | 125 (31.4) | 79 (19.6)  | 24 (5.5)   | <0.001 |
| Often                                                                                                                                                 | 421 (38.8) | 165 (40.9) | 170 (45.1) | 86 (20.9)  |        |
| Sometimes                                                                                                                                             | 286 (23.2) | 71 (17.9)  | 95 (25.3)  | 120 (28.5) |        |
| Rarely/never <sup>b</sup>                                                                                                                             | 266 (16.7) | 38 (9.7)   | 39 (10.1)  | 189 (45.1) |        |

<sup>a</sup>Due to small cell sizes for the counseling variables, the bottom three response categories were collapsed into one category.

<sup>b</sup>For the referral and systematic tracking variables, the bottom two response categories were collapsed into one category.
